# Supplementary material for: Screening of Natural Molecules as Adjuvants to Topical Antibiotics to Treat Staphylococcus aureus from Diabetic Foot Ulcer Infections
Source: MDPI journal article supplement (doi:10.3390/antibiotics11050620), 2022-05-04
Supplement: s1 [file s1]

**Table S1.** Inhibition zone diameters and respective classification of the results for the combinatorial application of different phytochemicals and antibiotics. Classification (C): **Potentiation (+++):** (IZDa+p –IZDa) ≥ 6 mm; **Additive (++):** 6 mm > (IZDa+p –IZDa) ≥ 4 mm; **Indifferent (+):** 4 mm > (IZDa+p –IZDa) > -6 mm; **Negative (-):** (IZDa+p –IZDa) ≤ - 6 mm. **T.I.** – total inhibition.

| Antibiotic   | Phytochemical | Antibiotic mass<br>(µg/disc)/<br>Phytochemical<br>concentration<br>(µg/mL) | CECT 976                 |                            |     | SA102                    |                            |    | SA109                    |                            |    | SA110                    |                            |     | SA111                    |                            |     | Xu212                    |                            |      | 1199B                    |                            |    | RN4220                   |                            |     |
|--------------|---------------|----------------------------------------------------------------------------|--------------------------|----------------------------|-----|--------------------------|----------------------------|----|--------------------------|----------------------------|----|--------------------------|----------------------------|-----|--------------------------|----------------------------|-----|--------------------------|----------------------------|------|--------------------------|----------------------------|----|--------------------------|----------------------------|-----|
|              |               |                                                                            | IZD <sub>a</sub><br>(mm) | IZD <sub>a+p</sub><br>(mm) | C   | IZD <sub>a</sub><br>(mm) | IZD <sub>a+p</sub><br>(mm) | C  | IZD <sub>a</sub><br>(mm) | IZD <sub>a+p</sub><br>(mm) | C  | IZD <sub>a</sub><br>(mm) | IZD <sub>a+p</sub><br>(mm) | C   | IZD <sub>a</sub><br>(mm) | IZD <sub>a+p</sub><br>(mm) | C   | IZD <sub>a</sub><br>(mm) | IZD <sub>a+p</sub><br>(mm) | C    | IZD <sub>a</sub><br>(mm) | IZD <sub>a+p</sub><br>(mm) | C  | IZD <sub>a</sub><br>(mm) | IZD <sub>a+p</sub><br>(mm) | C   |
| Fusidic acid | Chalcone      | 10/10                                                                      | 25.0                     | 26.0                       | +   |                          |                            |    |                          |                            |    |                          |                            |     | x                        |                            |     |                          |                            |      |                          |                            |    |                          |                            |     |
|              |               | 10/20                                                                      |                          | x                          |     | 24.0                     | 27.0                       | +  | 22.0                     | 25.5                       | ++ | 25.0                     | 32.5                       | +++ | 24.0                     | 27.8                       | ++  | 0                        | 0                          | +    | 24.0                     | 26.3                       | +  | 0                        | 0                          | +   |
|              | Juglone       | 10/1.25                                                                    | 25.0                     | 25.3                       | +   | 24.0                     | 26.0                       | +  | 22.0                     | 25.0                       | +  | 25.0                     | 24.0                       | +   | 24.0                     | 24.5                       | +   | 0                        | 0                          | +    | 24.0                     | 26.0                       | +  |                          | x                          |     |
|              |               | 10/2.5                                                                     |                          |                            |     |                          |                            |    |                          |                            |    | x                        |                            |     |                          |                            |     |                          |                            |      |                          |                            | 0  | 0                        | +                          |     |
|              | Cinnamic acid | 10/100                                                                     | 27.0                     | 28.8                       | +   | 24.3                     | 26.2                       | +  | 24.2                     | 26.2                       | +  | 25.3                     | 27.3                       | +   | 25.7                     | 28.0                       | +   | 0                        | 0                          | +    | 24.0                     | 26.7                       | +  | 0                        | 0                          | +   |
|              | Trigonelline  | 10/1000                                                                    | 25.0                     | 30.0                       | ++  | 24.0                     | 27.0                       | +  | 22.0                     | 27.0                       | ++ | 25.0                     | 27.8                       | +   | 24.0                     | 26.3                       | +   | 0                        | 0                          | +    | 24.0                     | 26.5                       | +  | 0                        | 0                          | +   |
|              | Furvina       | 10/2.5                                                                     |                          | x                          |     | 26.3                     | 25.5                       | +  | 24.5                     | 23.8                       | +  | 24.8                     | 25.3                       | +   | 26.0                     | 27.0                       | +   | 0                        | 0                          | +    | 25.8                     | 23.5                       | +  | 0                        | 0                          | +   |
|              |               | 10/10                                                                      | 28.8                     | 28.0                       | +   |                          |                            |    |                          |                            |    |                          |                            |     | x                        |                            |     |                          |                            |      |                          |                            |    |                          |                            |     |
|              |               | 10/5                                                                       | 28.8                     | 28.0                       | +   |                          |                            |    |                          |                            |    |                          | x                          |     |                          |                            |     |                          |                            |      |                          |                            | 0  | 0                        | +                          |     |
|              | Compound 1    | 10/10                                                                      |                          |                            |     | 26.3                     | 25.0                       | +  |                          |                            |    |                          |                            |     |                          |                            | x   |                          |                            |      |                          |                            |    |                          |                            |     |
|              |               | 10/20                                                                      |                          |                            |     |                          |                            |    | 24.5                     | 24.8                       | +  | 24.8                     | 24.8                       | +   | 26.0                     | 27.3                       | +   | 0                        | 0                          | +    | 25.8                     | 25.5                       | +  |                          | x                          |     |
|              | Compound 2    | 10/1000                                                                    | 28.8                     | 35.3                       | +++ | 26.3                     | 30.0                       | ++ | 24.5                     | 29.5                       | ++ | 24.8                     | 31.3                       | +++ | 26.0                     | 34.0                       | +++ | 0                        | 0                          | +    | 25.8                     | 29.5                       | ++ | 0                        | T.I.                       | +++ |
|              | Compound 3    | 10/10                                                                      |                          |                            |     | 26.3                     | 26.4                       | +  | 24.5                     | 23.8                       | +  | 24.8                     | 25.0                       | +   | 26.0                     | 26.8                       | +   | 0                        | 0                          | +    | 25.8                     | 24.8                       | +  |                          | x                          |     |
|              |               | 10/40                                                                      | 28.8                     | 39.3                       | +++ |                          |                            |    |                          |                            |    |                          |                            |     |                          | x                          |     |                          |                            |      |                          |                            |    |                          |                            |     |
|              | Compound 4    | 10/5                                                                       |                          |                            |     |                          |                            |    |                          |                            |    | x                        |                            |     |                          |                            |     |                          |                            |      |                          |                            | 0  | 0                        | +                          |     |
|              |               | 10/20                                                                      |                          |                            |     | 26.3                     | 25.3                       | +  | 24.5                     | 21.8                       | +  | 24.8                     | 24.8                       | +   | 26.0                     | 26.5                       | +   | 0                        | 0                          | +    | 25.8                     | 26.8                       | +  |                          | x                          |     |
|              |               | 10/100                                                                     | 28.8                     | 30.0                       | +   |                          |                            |    |                          |                            |    |                          |                            |     | x                        |                            |     |                          |                            |      |                          |                            |    |                          |                            |     |
|              | Guaiazulene   | 10/10                                                                      |                          |                            |     |                          |                            |    |                          | x                          |    |                          |                            |     |                          |                            | 0   | 0                        | +                          | 24.0 | 24.5                     | +                          |    | x                        |                            |     |
|              |               | 10/20                                                                      | 27.0                     | 25.5                       | +   | 24.3                     | 26.3                       | +  | 24.2                     | 24.7                       | +  | 25.3                     | 23.3                       | +   | 25.7                     | 27.8                       | +   |                          |                            | x    |                          |                            | 0  | 0                        | +                          |     |
|              | α-Bisabolol   | 10/5                                                                       | 27.0                     | 25.8                       | +   |                          | x                          |    | 24.2                     | 28.8                       | ++ |                          |                            |     |                          |                            | x   |                          |                            |      |                          |                            |    |                          |                            |     |
|              |               | 10/10                                                                      |                          | x                          |     | 24.3                     | 26.8                       | +  |                          | x                          |    | 25.3                     | 26.0                       | +   | 25.7                     | 28.7                       | +   | 0                        | 0                          | +    | 24.0                     | 28.3                       | ++ | 0                        | 0                          | +   |

| Compound      |          | Conc. |      | Yield |      | Purity |     | MW    |      | LogP  |      | Boiling |     | Melting |      | Density |      | Refractive        |     | Viscosity |      | Surface |     | Solubility |     |
|---------------|----------|-------|------|-------|------|--------|-----|-------|------|-------|------|---------|-----|---------|------|---------|------|-------------------|-----|-----------|------|---------|-----|------------|-----|
| Name          |          | g/L   |      | %     |      | %      |     | g/mol |      | cLogP |      | °C      |     | °C      |      | g/cm³   |      | n <sub>D</sub> ²⁰ |     | cP        |      | mN/m    |     | mg/mL      |     |
| Farnesol      | 10/2.5   | 27.0  | 25.5 | +     |      | x      |     | 24.2  | 25.8 | +     | 25.3 | 25.5    | +   |         | x    |         | 0    | 0                 | +   | 24.0      | 26.5 | +       |     | x          |     |
|               | 10/5     |       |      |       |      |        | x   |       |      |       |      |         |     | 25.7    | 31.3 | +++     |      |                   |     |           | x    |         |     |            |     |
|               | 10/10    |       | x    |       | 24.3 | 32.3   | +++ |       |      |       |      |         |     |         | x    |         |      |                   |     |           |      |         | 0   | 0          | +   |
|               | 10/5     |       |      | x     |      |        |     | 24.2  | 22.0 | +     |      |         |     |         |      |         | x    |                   |     |           |      |         |     |            |     |
| Nerolidol     | 10/10    | 27.0  | 27.0 | +     | 24.3 | 22.3   | +   |       | x    |       | 25.3 | 24.0    | +   | 25.7    | 25.8 | +       | 0    | 0                 | +   | 24.0      | 25.8 | +       | 0   | 0          | +   |
| Chalcone      | 200/10   | 35.8  | 40.5 | ++    |      |        |     |       |      |       |      |         |     |         | x    |         |      |                   |     |           |      |         |     |            |     |
|               | 200/20   |       | x    |       | 33.0 | 39.3   | +++ | 35.5  | 40.3 | ++    | 34.5 | 43.8    | +++ | 31.3    | 36.8 | +++     | 37.0 | 40.3              | +   | 38.0      | 41.0 | +       | 6.0 | 23.5       | +++ |
|               | 200/1.25 | 35.8  | 39.3 | ++    | 33.0 | 34.5   | +   | 35.5  | 36.8 | +     | 34.5 | 35.0    | +   | 31.3    | 34.0 | +       | 37.0 | 38.5              | +   | 38.0      | 38.5 | +       | 6.0 | 29.5       | +++ |
|               | 200/2.5  |       |      |       |      |        |     |       |      |       |      | x       |     |         |      |         |      |                   |     |           |      |         | 6.0 | 10.0       | ++  |
| Cinnamic acid | 200/100  | 39.5  | 39.0 | +     | 32.1 | 35.3   | +   | 35.8  | 36.7 | +     | 36.1 | 38.0    | +   | 33.2    | 34.8 | +       | 36.8 | 41.3              | ++  | 36.1      | 41.8 | +++     | 4.8 | 18.3       | +++ |
| Trigonelline  | 200/1000 | 35.8  | 41.8 | +++   | 33.0 | 35.8   | +   | 35.5  | 38.8 | +     | 34.5 | 39.3    | ++  | 31.3    | 34.0 | +       | 37.0 | 39.8              | +   | 38.0      | 40.0 | +       |     | x          |     |
| Furvina       | 200/2.5  |       |      |       | 33.3 | 33.0   | +   | 34.8  | 34.8 | +     | 35.0 | 37.0    | +   | 33.5    | 33.8 | +       | 37.3 | 38.3              | +   | 35.5      | 36.5 | +       | 5.8 | 19.3       | +++ |
|               | 200/10   | 40.3  | 41.8 | +     |      |        |     |       |      |       |      |         |     |         | x    |         |      |                   |     |           |      |         |     |            |     |
|               | 200/5    | 40.3  | 41.0 | +     |      |        |     |       |      |       |      |         | x   |         |      |         |      |                   |     |           |      |         | 5.8 | 19.8       | +++ |
| Compound 1    | 200/10   |       | x    |       | 33.3 | 34.5   | +   |       |      |       |      |         |     |         |      |         | x    |                   |     |           |      |         |     |            |     |
|               | 200/20   |       |      | x     |      |        |     | 34.8  | 35.0 | +     | 35.0 | 37.3    | +   | 33.5    | 33.5 | +       | 37.3 | 37.8              | +   | 35.5      | 37.3 | +       |     | x          |     |
| Compound 2    | 200/1000 | 40.3  | 54.0 | +++   | 33.3 | 39.5   | +++ | 34.8  | 44.3 | +++   | 35.0 | 45.0    | +++ | 33.5    | 43.8 | +++     | 37.3 | 47.8              | +++ | 35.5      | 47.8 | +++     | 5.8 | T.I.       | +++ |
| Compound 3    | 200/10   |       |      |       | 33.3 | 34.5   | +   | 34.8  | 34.8 | +     | 35.0 | 37.3    | +   | 33.5    | 35.5 | +       | 37.3 | 39.5              | +   | 35.5      | 37.5 | +       | 5.8 | 22.5       | +++ |
|               | 200/40   | 40.3  | 52.0 | +++   |      |        |     |       |      |       |      |         |     |         | x    |         |      |                   |     |           |      |         |     |            |     |
|               | 200/5    |       |      |       |      |        |     |       |      |       |      | x       |     |         |      |         |      |                   |     |           |      |         | 5.8 | 27.5       | +++ |
| Compound 4    | 200/20   |       | x    |       | 33.3 | 34.0   | +   | 34.8  | 34.8 | +     | 35.0 | 38.8    | ++  | 33.5    | 35.0 | +       | 37.3 | 40.0              | +   | 35.5      | 39.5 | ++      |     | x          |     |
|               | 200/100  | 40.3  | 43.3 | +     |      |        |     |       |      |       |      |         |     |         | x    |         |      |                   |     |           |      |         |     |            |     |
| Guaiazulene   | 200/10   |       |      |       |      |        |     |       | x    |       |      |         |     |         |      |         | 36.8 | 40.3              | ++  | 36.1      | 38.3 | +       |     | x          |     |
|               | 200/20   | 39.5  | 40.5 | +     | 32.1 | 33.3   | +   | 35.8  | 35.7 | +     | 36.1 | 35.0    | +   | 33.2    | 33.7 | +       |      |                   | x   |           |      |         | 4.8 | 19.4       | +++ |
| α-Bisabolol   | 200/5    | 39.5  | 41.0 | +     |      | x      |     | 35.8  | 36.5 | +     |      |         |     |         |      |         | x    |                   |     |           |      |         |     |            |     |
|               | 200/10   |       | x    |       | 32.1 | 36.8   | ++  |       | x    |       | 36.1 | 37.8    | +   | 33.2    | 36.7 | ++      | 36.8 | 42.7              | +++ | 36.1      | 40.7 | ++      | 4.8 | 17.2       | +++ |
|               | 200/2.5  | 39.5  | 39.8 | +     |      | x      |     | 35.8  | 36.0 | +     | 36.1 | 36.3    | +   |         | x    |         | 36.8 | 40.3              | +   | 36.1      | 38.0 | +       |     | x          |     |
| Farnesol      | 200/5    |       |      |       |      |        | x   |       |      |       |      |         |     | 33.2    | 38.9 | +++     |      |                   |     | x         |      |         |     |            |     |
|               | 200/10   |       | x    |       | 32.1 | 40.2   | +++ |       |      |       |      |         |     |         | x    |         |      |                   |     |           |      |         | 4.8 | 17.5       | +++ |
| Nerolidol     | 200/5    |       |      | x     |      |        |     | 35.8  | 35.0 | +     |      |         |     |         |      |         | x    |                   |     |           |      |         |     |            |     |
|               | 200/10   | 39.5  | 40.5 | +     | 32.1 | 33.0   | +   |       | x    |       | 36.1 | 37.5    | +   | 33.2    | 38.0 | ++      | 36.8 | 37.5              | +   | 36.1      | 39.8 | ++      | 4.8 | 17.5       | +++ |

|             |               |                     |        |      |      |     |   |     |      |      |      |      |      |      |   |     |     |      |      |      |      |      |      |   |   |      |     |
|-------------|---------------|---------------------|--------|------|------|-----|---|-----|------|------|------|------|------|------|---|-----|-----|------|------|------|------|------|------|---|---|------|-----|
| Methicillin | Chalcone      | 5/10                | 14.8   | 10.3 | +    |     |   |     |      |      |      |      |      |      |   | x   |     |      |      |      |      |      |      |   |   |      |     |
|             |               | 5/20                |        | x    |      | 0   | 0 | +   | 9.0  | 6.5  | +    | 5.5  | 7.0  | +    | 0 | 0   | +   | 6.0  | 4.3  | +    | 13.0 | 3.0  | -    | 0 | 0 | +    |     |
|             | Juglone       | 5/1.25              | 14.8   | 8.0  | -    | 0   | 0 | +   | 9.0  | 6.8  | +    | 5.5  | 0    | -    | 0 | 0   | +   | 6.0  | 3.5  | +    | 13.0 | 5.0  | -    |   | x |      |     |
|             |               | 5/2.5               |        |      |      |     |   |     |      |      |      |      | x    |      |   |     |     |      |      |      |      |      | 0    | 0 | + |      |     |
|             | Cinnamic acid | 5/100               | 20.5   | 17.0 | +    | 0   | 0 | +   | 14.3 | 12.0 | +    | 12.8 | 10.3 | +    | 0 | 0   | +   | 21.5 | 10.5 | -    | 19.0 | 12.3 | -    | 0 | 0 | +    |     |
|             | Trigonelline  | 5/1000              | 14.8   | 15.3 | +    | 0   | 0 | +   | 9.0  | 10.5 | +    | 5.5  | 8.5  | +    | 0 | 0   | +   | 6.0  | 7.0  | +    | 13.0 | 15.0 | +    | 0 | 0 | +    |     |
|             | Furvina       | 5/2.5               |        |      |      | 0   | 0 | +   | 13.5 | 10.0 | +    | 14.5 | 7.5  | -    | 0 | 0   | +   | 11.5 | 8.5  | -    | 18.0 | 10.0 | -    | 0 | 0 | +    |     |
|             |               | 5/10                | 18.2   | 18.3 | +    |     |   |     |      |      |      |      |      |      |   | x   |     |      |      |      |      |      |      |   |   |      |     |
|             |               |                     | 5/5    | 18.2 | 14.3 | +   |   |     |      |      |      |      |      |      | x |     |     |      |      |      |      |      |      | 0 | 0 | +    |     |
|             |               |                     | 5/10   |      |      |     | 0 | 0   | +    |      |      |      |      |      |   |     |     | x    |      |      |      |      |      |   |   |      |     |
|             |               | Compound 1          | 5/20   |      |      |     |   |     |      | 13.5 | 11.3 | +    | 14.5 | 7.5  | - | 0   | 0   | +    | 11.5 | 8.3  | -    | 18.0 | 12.0 | - |   | x    |     |
|             |               |                     | 5/1000 | 18.2 | 19.0 | +   | 0 | 0   | +    | 13.5 | 11.3 | +    | 14.5 | 11.3 | + | 0   | 0   | +    | 11.5 | 12.8 | +    | 18.0 | 12.0 | - | 0 | T.I. | +++ |
|             |               | Compound 3          | 5/10   |      |      |     | 0 | 0   | +    | 13.5 | 10.8 | +    | 14.5 | 7.0  | - | 0   | 0   | +    | 11.5 | 7.3  | -    | 18.0 | 9.8  | - | 0 | 0    | +   |
|             |               |                     | 5/40   | 18.2 | 26.0 | +++ |   |     |      |      |      |      |      |      |   |     | x   |      |      |      |      |      |      |   |   |      |     |
|             |               |                     | 5/5    |      |      |     |   |     |      |      |      |      | x    |      |   |     |     |      |      |      |      |      |      | 0 | 0 | +    |     |
|             |               |                     | 5/20   |      | x    |     | 0 | 0   | +    | 13.5 | 11.0 | +    | 14.5 | 7.8  | - | 0   | 0   | +    | 11.5 | 8.0  | -    | 18.0 | 11.0 | - |   | x    |     |
|             |               |                     | 5/100  | 18.2 | 15.0 | +   |   |     |      |      |      |      |      |      |   | x   |     |      |      |      |      |      |      |   |   |      |     |
|             |               |                     | 5/10   |      |      |     |   |     |      |      | x    |      |      |      |   |     |     |      | 21.5 | 12.3 | -    | 19.0 | 13.0 | - |   | x    |     |
|             |               | Guaiazulene         | 5/20   | 20.5 | 18.5 | +   | 0 | 0   | +    | 14.3 | 11.8 | +    | 12.8 | 11.0 | + | 0   | 0   | +    |      |      | x    |      |      |   | 0 | 0    | +   |
|             |               |                     | 5/5    | 20.5 | 16.0 | +   |   | x   |      | 14.3 | 11.0 | +    |      |      |   |     |     |      |      | x    |      |      |      |   |   |      |     |
|             |               | $\alpha$ -Bisabolol | 5/10   |      | x    |     | 0 | 3.5 | ++   |      | x    |      | 12.8 | 11.0 | + | 0   | 0   | +    | 21.5 | 13.5 | -    | 19.0 | 12.8 | - | 0 | 0    | +   |
|             |               |                     | 5/2.5  | 20.5 | 18.0 | +   |   | x   |      | 14.3 | 11.5 | +    | 12.8 | 13.0 | + |     | x   |      | 21.5 | 11.8 | -    | 19.0 | 12.5 | - |   | x    |     |
|             |               | Farnesol            | 5/5    |      |      |     |   |     | x    |      |      |      |      |      | 0 | 7.8 | +++ |      |      |      | x    |      |      |   |   |      |     |
|             |               |                     | 5/10   |      | x    |     | 0 | 8.0 | +++  |      |      |      |      |      |   | x   |     |      |      |      |      |      |      | 0 | 0 | +    |     |
|             |               | Nerolidol           | 5/5    |      |      |     | x |     |      | 14.3 | 13.3 | +    |      |      |   |     |     |      | x    |      |      |      |      |   |   |      |     |
|             |               |                     | 5/10   | 20.5 | 18.8 | +   | 0 | 0   | +    |      | x    |      | 12.8 | 13.5 | + | 0   | 0   | +    | 21.5 | 12.0 | -    | 19.0 | 12.8 | + | 0 | 0    | +   |
| Oxacillin   | Chalcone      | 1/10                | 20.0   | 18.0 | +    |     |   |     |      |      |      |      |      |      |   | x   |     |      |      |      |      |      |      |   |   |      |     |
|             |               | 1/20                |        | x    |      | 0   | 0 | +   | 17.0 | 11.3 | -    | 15.5 | 13.3 | +    | 0 | 0   | +   | 12.5 | 13.0 | +    | 20.8 | 12.0 | -    | 0 | 0 | +    |     |
|             | Juglone       | 1/1.25              | 20.0   | 16.0 | +    | 0   | 0 | +   | 17.0 | 10.0 | -    | 15.5 | 6.8  | -    | 0 | 0   | +   | 12.5 | 7.0  | -    | 20.8 | 11.3 | -    | 0 | 0 | +    |     |

|            |               |       |  |  |  |  |  |  |  |  |  |  |  |  |  |  |  |  |  |  |  |  |  |  |  |  |  |  |  |  |  |  |  |  |  |  |  |  |  |  |  |  |  |  |  |  |  |  |  |  |  |  |  |  |  |  |  |  |  |  |  |  |  |  |  |  |  |  |  |  |  |  |  |  |  |  |  |  |  |  |  |  |  |  |  |  |  |  |  |  |  |  |  |  |  |  |  |  |  |  |  |  |  |  |  |  |  |  |  |  |  |  |  |  |  |  |  |  |  |  |  |  |  |  |  |  |  |  |  |  |  |  |  |  |  |  |  |  |  |  |  |  |  |  |  |  |  |  |  |  |  |  |  |  |  |  |  |  |  |  |  |  |  |  |  |  |  |  |  |  |  |  |  |  |  |  |  |  |  |  |  |  |  |  |  |  |  |  |  |  |  |  |  |  |  |  |  |  |  |  |  |  |  |  |  |  |  |  |  |  |  |  |  |  |  |  |  |  |  |  |  |  |  |  |  |  |  |  |  |  |  |  |  |  |  |  |  |  |  |  |  |  |  |  |  |  |  |  |  |  |  |  |  |  |  |  |  |  |  |  |  |  |  |  |  |  |  |  |  |  |  |  |  |  |  |  |  |  |  |  |  |  |  |  |  |  |  |  |  |  |  |  |  |  |  |  |  |  |  |  |  |  |  |  |  |  |  |  |  |  |  |  |  |  |  |  |  |  |  |  |  |  |  |  |  |  |  |  |  |  |  |  |  |  |  |  |  |  |  |  |  |  |  |  |  |  |  |  |  |  |  |  |  |  |  |  |  |  |  |  |  |  |  |  |  |  |  |  |  |  |  |  |  |  |  |  |  |  |  |  |  |  |  |  |  |  |  |  |  |  |  |  |  |  |  |  |  |  |  |  |  |  |  |  |  |  |  |  |  |  |  |  |  |  |  |  |  |  |  |  |  |  |  |  |  |  |  |  |  |  |  |  |  |  |  |  |  |  |  |  |  |  |  |  |  |  |  |  |  |  |  |  |  |  |  |  |  |  |  |  |  |  |  |  |  |  |  |  |  |  |  |  |  |  |  |  |  |  |  |  |  |  |  |  |  |  |  |  |  |  |  |  |  |  |  |  |  |  |  |  |  |  |  |  |  |  |  |  |  |  |  |  |  |  |  |  |  |  |  |  |  |  |  |  |  |  |  |  |  |  |  |  |  |  |  |  |  |  |  |  |  |  |  |  |  |  |  |  |  |  |  |  |  |  |  |  |  |  |  |  |  |  |  |  |  |  |  |  |  |  |  |  |  |  |  |  |  |  |  |  |  |  |  |  |  |  |  |  |  |  |  |  |  |  |  |  |  |  |  |  |  |  |  |  |  |  |  |  |  |  |  |  |  |  |  |  |  |  |  |  |  |  |  |  |  |  |  |  |  |  |  |  |  |  |  |  |  |  |  |  |  |  |  |  |  |  |  |  |  |  |  |  |  |  |  |  |  |  |  |  |  |  |  |  |  |  |  |  |  |  |  |  |  |  |  |  |  |  |  |  |  |  |  |  |  |  |  |  |  |  |  |  |  |  |  |  |  |  |  |  |  |  |  |  |  |  |  |  |  |  |  |  |  |  |  |  |  |  |  |  |  |  |  |  |  |  |  |  |  |  |  |  |  |  |  |  |  |  |  |  |  |  |  |  |  |  |  |  |  |  |  |  |  |  |  |  |  |  |  |  |  |  |  |  |  |  |  |  |  |  |  |  |  |  |  |  |  |  |  |  |  |  |  |  |  |  |  |  |  |  |  |  |  |  |  |  |  |  |  |  |  |  |  |  |  |  |  |  |  |  |  |  |  |  |  |  |  |  |  |  |  |  |  |  |  |  |  |  |  |  |  |  |  |  |  |  |  |  |  |  |  |  |  |  |  |  |  |  |  |  |  |  |  |  |  |  |  |  |  |  |  |  |  |  |  |  |  |  |  |  |  |  |  |  |  |  |  |  |  |  |  |  |  |  |  |  |  |  |  |  |  |  |  |  |  |  |  |  |  |  |  |  |  |  |  |  |  |  |  |  |  |  |  |  |  |  |  |  |  |  |  |  |  |  |  |  |  |  |  |  |  |  |  |  |  |  |  |  |  |  |  |  |  |  |  |  |  |  |  |  |  |  |  |  |  |  |  |  |  |  |  |  |  |  |  |  |  |  |  |  |  |  |  |  |  |  |  |  |  |  |  |  |  |  |  |  |  |  |  |  |  |  |  |  |  |  |  |  |  |  |  |  |  |  |  |  |  |  |  |  |  |  |  |  |  |  |  |  |  |  |  |  |  |  |  |  |  |  |  |  |  |  |  |  |  |  |  |  |  |  |  |  |  |  |  |  |  |  |  |  |  |  |  |  |  |  |  |  |  |  |  |  |  |  |  |  |  |  |  |  |  |  |  |  |  |  |  |  |  |  |  |  |  |  |  |  |  |  |  |  |  |  |  |  |  |  |  |  |  |  |  |  |  |  |  |  |  |  |  |  |  |  |  |  |  |  |  |  |  |  |  |  |  |  |  |  |  |  |  |  |  |  |  |  |  |  |  |  |  |  |  |  |  |  |  |  |  |  |  |  |  |  |  |  |  |  |  |  |  |  |  |  |  |  |  |  |  |  |  |  |  |  |  |  |  |  |  |  |  |  |  |  |  |  |  |  |  |  |  |  |  |  |  |  |  |  |  |  |  |  |  |  |  |  |  |  |  |  |  |  |  |  |  |  |  |  |  |  |  |  |  |  |  |  |  |  |  |  |  |  |  |  |  |  |  |  |  |  |  |  |  |  |  |  |  |  |  |  |  |  |  |  |  |  |  |  |  |  |  |  |  |  |  |  |  |  |  |  |  |  |  |  |  |  |  |  |  |  |  |  |  |  |  |  |  |  |  |  |  |  |  |  |  |  |  |  |  |  |  |  |  |  |  |  |  |  |  |  |  |  |  |  |  |  |  |  |  |  |  |  |  |  |  |  |  |  |  |  |  |  |  |  |  |  |  |  |  |  |  |  |  |  |  |  |  |  |  |  |  |  |  |  |  |  |  |  |  |  |  |
|------------|---------------|-------|--|--|--|--|--|--|--|--|--|--|--|--|--|--|--|--|--|--|--|--|--|--|--|--|--|--|--|--|--|--|--|--|--|--|--|--|--|--|--|--|--|--|--|--|--|--|--|--|--|--|--|--|--|--|--|--|--|--|--|--|--|--|--|--|--|--|--|--|--|--|--|--|--|--|--|--|--|--|--|--|--|--|--|--|--|--|--|--|--|--|--|--|--|--|--|--|--|--|--|--|--|--|--|--|--|--|--|--|--|--|--|--|--|--|--|--|--|--|--|--|--|--|--|--|--|--|--|--|--|--|--|--|--|--|--|--|--|--|--|--|--|--|--|--|--|--|--|--|--|--|--|--|--|--|--|--|--|--|--|--|--|--|--|--|--|--|--|--|--|--|--|--|--|--|--|--|--|--|--|--|--|--|--|--|--|--|--|--|--|--|--|--|--|--|--|--|--|--|--|--|--|--|--|--|--|--|--|--|--|--|--|--|--|--|--|--|--|--|--|--|--|--|--|--|--|--|--|--|--|--|--|--|--|--|--|--|--|--|--|--|--|--|--|--|--|--|--|--|--|--|--|--|--|--|--|--|--|--|--|--|--|--|--|--|--|--|--|--|--|--|--|--|--|--|--|--|--|--|--|--|--|--|--|--|--|--|--|--|--|--|--|--|--|--|--|--|--|--|--|--|--|--|--|--|--|--|--|--|--|--|--|--|--|--|--|--|--|--|--|--|--|--|--|--|--|--|--|--|--|--|--|--|--|--|--|--|--|--|--|--|--|--|--|--|--|--|--|--|--|--|--|--|--|--|--|--|--|--|--|--|--|--|--|--|--|--|--|--|--|--|--|--|--|--|--|--|--|--|--|--|--|--|--|--|--|--|--|--|--|--|--|--|--|--|--|--|--|--|--|--|--|--|--|--|--|--|--|--|--|--|--|--|--|--|--|--|--|--|--|--|--|--|--|--|--|--|--|--|--|--|--|--|--|--|--|--|--|--|--|--|--|--|--|--|--|--|--|--|--|--|--|--|--|--|--|--|--|--|--|--|--|--|--|--|--|--|--|--|--|--|--|--|--|--|--|--|--|--|--|--|--|--|--|--|--|--|--|--|--|--|--|--|--|--|--|--|--|--|--|--|--|--|--|--|--|--|--|--|--|--|--|--|--|--|--|--|--|--|--|--|--|--|--|--|--|--|--|--|--|--|--|--|--|--|--|--|--|--|--|--|--|--|--|--|--|--|--|--|--|--|--|--|--|--|--|--|--|--|--|--|--|--|--|--|--|--|--|--|--|--|--|--|--|--|--|--|--|--|--|--|--|--|--|--|--|--|--|--|--|--|--|--|--|--|--|--|--|--|--|--|--|--|--|--|--|--|--|--|--|--|--|--|--|--|--|--|--|--|--|--|--|--|--|--|--|--|--|--|--|--|--|--|--|--|--|--|--|--|--|--|--|--|--|--|--|--|--|--|--|--|--|--|--|--|--|--|--|--|--|--|--|--|--|--|--|--|--|--|--|--|--|--|--|--|--|--|--|--|--|--|--|--|--|--|--|--|--|--|--|--|--|--|--|--|--|--|--|--|--|--|--|--|--|--|--|--|--|--|--|--|--|--|--|--|--|--|--|--|--|--|--|--|--|--|--|--|--|--|--|--|--|--|--|--|--|--|--|--|--|--|--|--|--|--|--|--|--|--|--|--|--|--|--|--|--|--|--|--|--|--|--|--|--|--|--|--|--|--|--|--|--|--|--|--|--|--|--|--|--|--|--|--|--|--|--|--|--|--|--|--|--|--|--|--|--|--|--|--|--|--|--|--|--|--|--|--|--|--|--|--|--|--|--|--|--|--|--|--|--|--|--|--|--|--|--|--|--|--|--|--|--|--|--|--|--|--|--|--|--|--|--|--|--|--|--|--|--|--|--|--|--|--|--|--|--|--|--|--|--|--|--|--|--|--|--|--|--|--|--|--|--|--|--|--|--|--|--|--|--|--|--|--|--|--|--|--|--|--|--|--|--|--|--|--|--|--|--|--|--|--|--|--|--|--|--|--|--|--|--|--|--|--|--|--|--|--|--|--|--|--|--|--|--|--|--|--|--|--|--|--|--|--|--|--|--|--|--|--|--|--|--|--|--|--|--|--|--|--|--|--|--|--|--|--|--|--|--|--|--|--|--|--|--|--|--|--|--|--|--|--|--|--|--|--|--|--|--|--|--|--|--|--|--|--|--|--|--|--|--|--|--|--|--|--|--|--|--|--|--|--|--|--|--|--|--|--|--|--|--|--|--|--|--|--|--|--|--|--|--|--|--|--|--|--|--|--|--|--|--|--|--|--|--|--|--|--|--|--|--|--|--|--|--|--|--|--|--|--|--|--|--|--|--|--|--|--|--|--|--|--|--|--|--|--|--|--|--|--|--|--|--|--|--|--|--|--|--|--|--|--|--|--|--|--|--|--|--|--|--|--|--|--|--|--|--|--|--|--|--|--|--|--|--|--|--|--|--|--|--|--|--|--|--|--|--|--|--|--|--|--|--|--|--|--|--|--|--|--|--|--|--|--|--|--|--|--|--|--|--|--|--|--|--|--|--|--|--|--|--|--|--|--|--|--|--|--|--|--|--|--|--|--|--|--|--|--|--|--|--|--|--|--|--|--|--|--|--|--|--|--|--|--|--|--|--|--|--|--|--|--|--|--|--|--|--|--|--|--|--|--|--|--|--|--|--|--|--|--|--|--|--|--|--|--|--|--|--|--|--|--|--|--|--|--|--|--|--|--|--|--|--|--|--|--|--|--|--|--|--|--|--|--|--|--|--|--|--|--|--|--|--|--|--|--|--|--|--|--|--|--|--|--|--|--|--|--|--|--|--|--|--|--|--|--|--|--|--|--|--|--|--|--|--|--|--|--|--|--|--|--|--|--|--|--|--|--|--|--|--|--|--|--|--|--|--|--|--|--|--|--|--|--|--|--|--|--|--|--|--|--|--|--|--|--|--|--|--|--|--|--|--|--|--|--|--|--|--|--|--|--|--|--|--|--|--|--|--|--|--|--|--|--|--|--|--|--|--|
| Gentamicin | Cinnamic acid | 1/2.5 |  |  |  |  |  |  |  |  |  |  |  |  |  |  |  |  |  |  |  |  |  |  |  |  |  |  |  |  |  |  |  |  |  |  |  |  |  |  |  |  |  |  |  |  |  |  |  |  |  |  |  |  |  |  |  |  |  |  |  |  |  |  |  |  |  |  |  |  |  |  |  |  |  |  |  |  |  |  |  |  |  |  |  |  |  |  |  |  |  |  |  |  |  |  |  |  |  |  |  |  |  |  |  |  |  |  |  |  |  |  |  |  |  |  |  |  |  |  |  |  |  |  |  |  |  |  |  |  |  |  |  |  |  |  |  |  |  |  |  |  |  |  |  |  |  |  |  |  |  |  |  |  |  |  |  |  |  |  |  |  |  |  |  |  |  |  |  |  |  |  |  |  |  |  |  |  |  |  |  |  |  |  |  |  |  |  |  |  |  |  |  |  |  |  |  |  |  |  |  |  |  |  |  |  |  |  |  |  |  |  |  |  |  |  |  |  |  |  |  |  |  |  |  |  |  |  |  |  |  |  |  |  |  |  |  |  |  |  |  |  |  |  |  |  |  |  |  |  |  |  |  |  |  |  |  |  |  |  |  |  |  |  |  |  |  |  |  |  |  |  |  |  |  |  |  |  |  |  |  |  |  |  |  |  |  |  |  |  |  |  |  |  |  |  |  |  |  |  |  |  |  |  |  |  |  |  |  |  |  |  |  |  |  |  |  |  |  |  |  |  |  |  |  |  |  |  |  |  |  |  |  |  |  |  |  |  |  |  |  |  |  |  |  |  |  |  |  |  |  |  |  |  |  |  |  |  |  |  |  |  |  |  |  |  |  |  |  |  |  |  |  |  |  |  |  |  |  |  |  |  |  |  |  |  |  |  |  |  |  |  |  |  |  |  |  |  |  |  |  |  |  |  |  |  |  |  |  |  |  |  |  |  |  |  |  |  |  |  |  |  |  |  |  |  |  |  |  |  |  |  |  |  |  |  |  |  |  |  |  |  |  |  |  |  |  |  |  |  |  |  |  |  |  |  |  |  |  |  |  |  |  |  |  |  |  |  |  |  |  |  |  |  |  |  |  |  |  |  |  |  |  |  |  |  |  |  |  |  |  |  |  |  |  |  |  |  |  |  |  |  |  |  |  |  |  |  |  |  |  |  |  |  |  |  |  |  |  |  |  |  |  |  |  |  |  |  |  |  |  |  |  |  |  |  |  |  |  |  |  |  |  |  |  |  |  |  |  |  |  |  |  |  |  |  |  |  |  |  |  |  |  |  |  |  |  |  |  |  |  |  |  |  |  |  |  |  |  |  |  |  |  |  |  |  |  |  |  |  |  |  |  |  |  |  |  |  |  |  |  |  |  |  |  |  |  |  |  |  |  |  |  |  |  |  |  |  |  |  |  |  |  |  |  |  |  |  |  |  |  |  |  |  |  |  |  |  |  |  |  |  |  |  |  |  |  |  |  |  |  |  |  |  |  |  |  |  |  |  |  |  |  |  |  |  |  |  |  |  |  |  |  |  |  |  |  |  |  |  |  |  |  |  |  |  |  |  |  |  |  |  |  |  |  |  |  |  |  |  |  |  |  |  |  |  |  |  |  |  |  |  |  |  |  |  |  |  |  |  |  |  |  |  |  |  |  |  |  |  |  |  |  |  |  |  |  |  |  |  |  |  |  |  |  |  |  |  |  |  |  |  |  |  |  |  |  |  |  |  |  |  |  |  |  |  |  |  |  |  |  |  |  |  |  |  |  |  |  |  |  |  |  |  |  |  |  |  |  |  |  |  |  |  |  |  |  |  |  |  |  |  |  |  |  |  |  |  |  |  |  |  |  |  |  |  |  |  |  |  |  |  |  |  |  |  |  |  |  |  |  |  |  |  |  |  |  |  |  |  |  |  |  |  |  |  |  |  |  |  |  |  |  |  |  |  |  |  |  |  |  |  |  |  |  |  |  |  |  |  |  |  |  |  |  |  |  |  |  |  |  |  |  |  |  |  |  |  |  |  |  |  |  |  |  |  |  |  |  |  |  |  |  |  |  |  |  |  |  |  |  |  |  |  |  |  |  |  |  |  |  |  |  |  |  |  |  |  |  |  |  |  |  |  |  |  |  |  |  |  |  |  |  |  |  |  |  |  |  |  |  |  |  |  |  |  |  |  |  |  |  |  |  |  |  |  |  |  |  |  |  |  |  |  |  |  |  |  |  |  |  |  |  |  |  |  |  |  |  |  |  |  |  |  |  |  |  |  |  |  |  |  |  |  |  |  |  |  |  |  |  |  |  |  |  |  |  |  |  |  |  |  |  |  |  |  |  |  |  |  |  |  |  |  |  |  |  |  |  |  |  |  |  |  |  |  |  |  |  |  |  |  |  |  |  |  |  |  |  |  |  |  |  |  |  |  |  |  |  |  |  |  |  |  |  |  |  |  |  |  |  |  |  |  |  |  |  |  |  |  |  |  |  |  |  |  |  |  |  |  |  |  |  |  |  |  |  |  |  |  |  |  |  |  |  |  |  |  |  |  |  |  |  |  |  |  |  |  |  |  |  |  |  |  |  |  |  |  |  |  |  |  |  |  |  |  |  |  |  |  |  |  |  |  |  |  |  |  |  |  |  |  |  |  |  |  |  |  |  |  |  |  |  |  |  |  |  |  |  |  |  |  |  |  |  |  |  |  |  |  |  |  |  |  |  |  |  |  |  |  |  |  |  |  |  |  |  |  |  |  |  |  |  |  |  |  |  |  |  |  |  |  |  |  |  |  |  |  |  |  |  |  |  |  |  |  |  |  |  |  |  |  |  |  |  |  |  |  |  |  |  |  |  |  |  |  |  |  |  |  |  |  |  |  |  |  |  |  |  |  |  |  |  |  |  |  |  |  |  |  |  |  |  |  |  |  |  |  |  |  |  |  |  |  |  |  |  |  |  |  |  |  |  |  |  |  |  |  |  |  |  |  |  |  |  |  |  |  |  |  |  |  |  |  |  |  |  |  |  |  |  |  |  |  |  |  |  |  |  |  |  |  |  |  |  |  |  |  |  |  |  |  |  |  |  |  |  |  |  |
|------------|---------------|-------|--|--|--|--|--|--|--|--|--|--|--|--|--|--|--|--|--|--|--|--|--|--|--|--|--|--|--|--|--|--|--|--|--|--|--|--|--|--|--|--|--|--|--|--|--|--|--|--|--|--|--|--|--|--|--|--|--|--|--|--|--|--|--|--|--|--|--|--|--|--|--|--|--|--|--|--|--|--|--|--|--|--|--|--|--|--|--|--|--|--|--|--|--|--|--|--|--|--|--|--|--|--|--|--|--|--|--|--|--|--|--|--|--|--|--|--|--|--|--|--|--|--|--|--|--|--|--|--|--|--|--|--|--|--|--|--|--|--|--|--|--|--|--|--|--|--|--|--|--|--|--|--|--|--|--|--|--|--|--|--|--|--|--|--|--|--|--|--|--|--|--|--|--|--|--|--|--|--|--|--|--|--|--|--|--|--|--|--|--|--|--|--|--|--|--|--|--|--|--|--|--|--|--|--|--|--|--|--|--|--|--|--|--|--|--|--|--|--|--|--|--|--|--|--|--|--|--|--|--|--|--|--|--|--|--|--|--|--|--|--|--|--|--|--|--|--|--|--|--|--|--|--|--|--|--|--|--|--|--|--|--|--|--|--|--|--|--|--|--|--|--|--|--|--|--|--|--|--|--|--|--|--|--|--|--|--|--|--|--|--|--|--|--|--|--|--|--|--|--|--|--|--|--|--|--|--|--|--|--|--|--|--|--|--|--|--|--|--|--|--|--|--|--|--|--|--|--|--|--|--|--|--|--|--|--|--|--|--|--|--|--|--|--|--|--|--|--|--|--|--|--|--|--|--|--|--|--|--|--|--|--|--|--|--|--|--|--|--|--|--|--|--|--|--|--|--|--|--|--|--|--|--|--|--|--|--|--|--|--|--|--|--|--|--|--|--|--|--|--|--|--|--|--|--|--|--|--|--|--|--|--|--|--|--|--|--|--|--|--|--|--|--|--|--|--|--|--|--|--|--|--|--|--|--|--|--|--|--|--|--|--|--|--|--|--|--|--|--|--|--|--|--|--|--|--|--|--|--|--|--|--|--|--|--|--|--|--|--|--|--|--|--|--|--|--|--|--|--|--|--|--|--|--|--|--|--|--|--|--|--|--|--|--|--|--|--|--|--|--|--|--|--|--|--|--|--|--|--|--|--|--|--|--|--|--|--|--|--|--|--|--|--|--|--|--|--|--|--|--|--|--|--|--|--|--|--|--|--|--|--|--|--|--|--|--|--|--|--|--|--|--|--|--|--|--|--|--|--|--|--|--|--|--|--|--|--|--|--|--|--|--|--|--|--|--|--|--|--|--|--|--|--|--|--|--|--|--|--|--|--|--|--|--|--|--|--|--|--|--|--|--|--|--|--|--|--|--|--|--|--|--|--|--|--|--|--|--|--|--|--|--|--|--|--|--|--|--|--|--|--|--|--|--|--|--|--|--|--|--|--|--|--|--|--|--|--|--|--|--|--|--|--|--|--|--|--|--|--|--|--|--|--|--|--|--|--|--|--|--|--|--|--|--|--|--|--|--|--|--|--|--|--|--|--|--|--|--|--|--|--|--|--|--|--|--|--|--|--|--|--|--|--|--|--|--|--|--|--|--|--|--|--|--|--|--|--|--|--|--|--|--|--|--|--|--|--|--|--|--|--|--|--|--|--|--|--|--|--|--|--|--|--|--|--|--|--|--|--|--|--|--|--|--|--|--|--|--|--|--|--|--|--|--|--|--|--|--|--|--|--|--|--|--|--|--|--|--|--|--|--|--|--|--|--|--|--|--|--|--|--|--|--|--|--|--|--|--|--|--|--|--|--|--|--|--|--|--|--|--|--|--|--|--|--|--|--|--|--|--|--|--|--|--|--|--|--|--|--|--|--|--|--|--|--|--|--|--|--|--|--|--|--|--|--|--|--|--|--|--|--|--|--|--|--|--|--|--|--|--|--|--|--|--|--|--|--|--|--|--|--|--|--|--|--|--|--|--|--|--|--|--|--|--|--|--|--|--|--|--|--|--|--|--|--|--|--|--|--|--|--|--|--|--|--|--|--|--|--|--|--|--|--|--|--|--|--|--|--|--|--|--|--|--|--|--|--|--|--|--|--|--|--|--|--|--|--|--|--|--|--|--|--|--|--|--|--|--|--|--|--|--|--|--|--|--|--|--|--|--|--|--|--|--|--|--|--|--|--|--|--|--|--|--|--|--|--|--|--|--|--|--|--|--|--|--|--|--|--|--|--|--|--|--|--|--|--|--|--|--|--|--|--|--|--|--|--|--|--|--|--|--|--|--|--|--|--|--|--|--|--|--|--|--|--|--|--|--|--|--|--|--|--|--|--|--|--|--|--|--|--|--|--|--|--|--|--|--|--|--|--|--|--|--|--|--|--|--|--|--|--|--|--|--|--|--|--|--|--|--|--|--|--|--|--|--|--|--|--|--|--|--|--|--|--|--|--|--|--|--|--|--|--|--|--|--|--|--|--|--|--|--|--|--|--|--|--|--|--|--|--|--|--|--|--|--|--|--|--|--|--|--|--|--|--|--|--|--|--|--|--|--|--|--|--|--|--|--|--|--|--|--|--|--|--|--|--|--|--|--|--|--|--|--|--|--|--|--|--|--|--|--|--|--|--|--|--|--|--|--|--|--|--|--|--|--|--|--|--|--|--|--|--|--|--|--|--|--|--|--|--|--|--|--|--|--|--|--|--|--|--|--|--|--|--|--|--|--|--|--|--|--|--|--|--|--|--|--|--|--|--|--|--|--|--|--|--|--|--|--|--|--|--|--|--|--|--|--|--|--|--|--|--|--|--|--|--|--|--|--|--|--|--|--|--|--|--|--|--|--|--|--|--|--|--|--|--|--|--|--|--|--|--|--|--|--|--|--|--|--|--|--|--|--|--|--|--|--|--|--|--|--|--|--|--|--|--|--|--|--|--|--|--|--|--|--|--|--|--|--|--|--|--|--|--|--|--|--|--|--|--|--|--|--|--|--|--|--|--|--|--|--|--|--|--|--|--|--|--|--|--|--|--|--|--|--|--|--|--|--|--|--|--|--|--|--|--|--|

|                     |         |      |      |     |      |      |     |      |      |      |      |      |      |      |      |      |     |   |      |      |      |      |      |      |      |     |  |   |
|---------------------|---------|------|------|-----|------|------|-----|------|------|------|------|------|------|------|------|------|-----|---|------|------|------|------|------|------|------|-----|--|---|
| Compound 1          | 10/5    | 18.3 | 17.8 | +   | x    |      |     |      |      |      |      |      |      |      |      |      |     |   |      |      |      | 13.8 | 20.3 | +++  |      |     |  |   |
|                     | 10/10   |      | x    |     | 17.3 | 14.3 | +   |      |      |      |      |      |      |      |      |      |     | x |      |      |      |      |      |      |      |     |  |   |
|                     | 10/20   |      |      | x   |      |      |     | 15.5 | 10.8 | +    | 14.3 | 12.5 | +    | 18.3 | 14.0 | +    | 0   | 0 | +    | 16.3 | 13.0 | +    |      | x    |      |     |  |   |
| Compound 2          | 10/1000 | 18.3 | 13.4 | +   | 17.3 | 9.5  | -   | 15.5 | 6.5  | -    | 14.3 | 8.0  | -    | 18.3 | 12.0 | -    | 0   | 0 | +    | 16.3 | 9.8  | -    | 13.8 | T.I. | +++  |     |  |   |
| Compound 3          | 10/10   |      | x    |     | 17.3 | 13.8 | +   | 15.5 | 11.5 | +    | 14.3 | 13.3 | +    | 18.3 | 14.3 | +    | 0   | 0 | +    | 16.3 | 13.5 | +    | 13.8 | 19.5 | +++  |     |  |   |
|                     | 10/40   | 18.3 | 29.0 | +++ |      |      |     |      |      |      |      |      |      |      |      |      |     |   |      |      |      |      |      |      |      |     |  |   |
| Compound 4          | 10/5    |      |      |     |      |      |     |      |      |      |      |      |      |      | x    |      |     |   |      |      | 13.8 | 21.5 | +++  |      |      |     |  |   |
|                     | 10/20   |      |      |     | 17.3 | 12.3 | +   | 15.5 | 12.0 | +    | 14.3 | 13.5 | +    | 18.3 | 13.8 | +    | 0   | 0 | +    | 16.3 | 14.8 | +    |      | x    |      |     |  |   |
|                     | 10/100  | 18.3 | 19.8 | +   |      |      |     |      |      |      |      |      |      |      |      |      |     |   |      |      |      | x    |      |      |      |     |  |   |
| Guaiazulene         | 10/10   |      |      |     |      |      |     |      |      |      |      |      |      |      | x    |      |     |   |      |      | 0    | 0    | +    | 16.3 | 25.0 | +++ |  | x |
|                     | 10/20   | 18.3 | 27.0 | +++ | 17.5 | 20.5 | +   | 13.0 | 19.5 | +++  | 13.8 | 18.5 | ++   | 15.2 | 25.0 | +++  |     |   |      | x    |      |      | 15.8 | 25.0 | +++  |     |  |   |
| $\alpha$ -Bisabolol | 10/5    | 18.3 | 25.8 | +++ | x    |      |     |      | 13.0 | 23.0 | +++  |      |      |      |      |      |     |   |      |      |      | x    |      |      |      |     |  |   |
|                     | 10/10   |      | x    |     | 17.5 | 25.0 | +++ | x    |      |      |      | 13.8 | 21.0 | +++  | 15.2 | 28.5 | +++ | 0 | 0    | +    | 16.3 | 34.0 | +++  | 15.8 | 26.0 | +++ |  |   |
| Farnesol            | 10/2.5  | 18.3 | 26.0 | +++ | x    |      |     |      | 13.0 | 20.5 | +++  | 13.8 | 18.0 | ++   | x    |      |     | 0 | 0    | +    | 16.3 | 27.0 | +++  |      | x    |     |  |   |
|                     | 10/5    |      |      |     | x    |      |     |      |      |      |      |      |      |      |      |      |     |   | 15.2 | 33.0 | +++  |      |      |      | x    |     |  |   |
|                     | 10/10   |      | x    |     | 17.5 | 30.0 | +++ |      |      |      |      |      |      |      |      |      |     | x |      |      |      |      |      | 15.8 | 25.0 | +++ |  |   |
| Nerolidol           | 10/5    |      |      | x   |      |      |     |      | 13.0 | 21.3 | +++  |      |      |      |      |      |     |   |      |      |      | x    |      |      |      |     |  |   |
|                     | 10/10   | 18.3 | 28.5 | +++ | 17.5 | 23.3 | +++ | x    |      |      |      | 13.8 | 19.5 | +++  | 15.2 | 32.8 | +++ | 0 | 0    | +    | 16.3 | 28.5 | +++  | 15.8 | 26.0 | +++ |  |   |
